# Supplementary material for: Ultrafine Co0.85Se nanocrystals dispersed in 3D CNT network as a flexible free-standing anode for high-performance lithium-ion battery
Source: Royal Society of Chemistry journal article supplement (doi:10.1039/d1nj01385h), 2021-01-01
Supplement: d1nj01385h1.pdf [file d1nj01385h1.pdf]

## Supplementary Materials

### **Ultrafine Co<sub>0.85</sub>Se nanocrystals dispersed in 3D CNT network as flexible free-standing anode for high performance Lithium-ion battery**

Huapeng Li<sup>a</sup>, Tongye Wei<sup>c</sup>, Shouji Huang<sup>a</sup>, Guobao Xu<sup>b</sup>, Xiong Liu<sup>a</sup>, Jiao Tian<sup>a</sup>,

Liwen Yang<sup>a</sup>, Juexian Cao<sup>c</sup>, Xiaolin Wei<sup>a,\*</sup>

*<sup>a</sup>School of Physics and Optoelectronics, Xiangtan University, Hunan 411105, China*

*<sup>b</sup>National-Provincial Laboratory of Special Function Thin Film Materials, School of  
Materials Science and Engineering, Xiangtan University, 411105, Hunan, China*

*<sup>c</sup>Hunan Institute of Advanced Sensing and Information Technology, Xiangtan  
University, Hunan, 411105 China*

---

\* Corresponding authors: [xlw@xtu.edu.cn](mailto:xlw@xtu.edu.cn)(X. L. Wei);

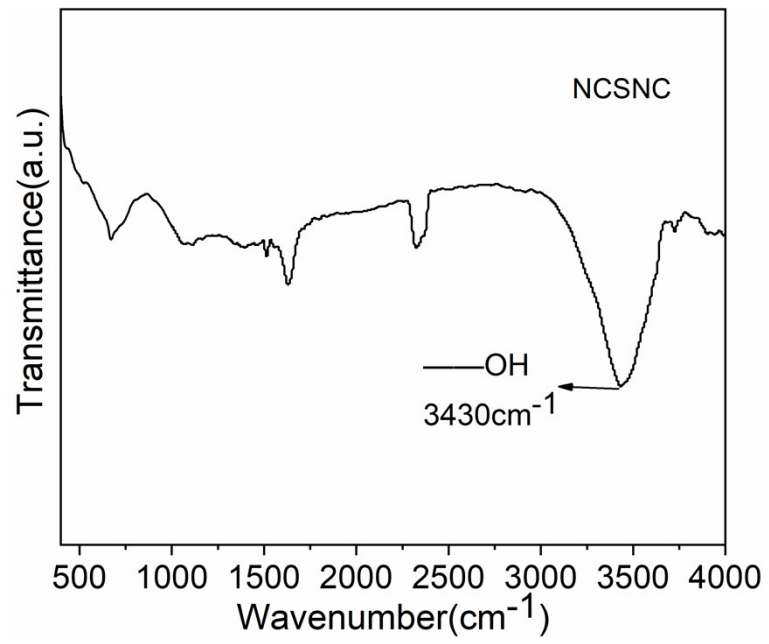

**Figure. S1** FTIR spectra of NCSNC.

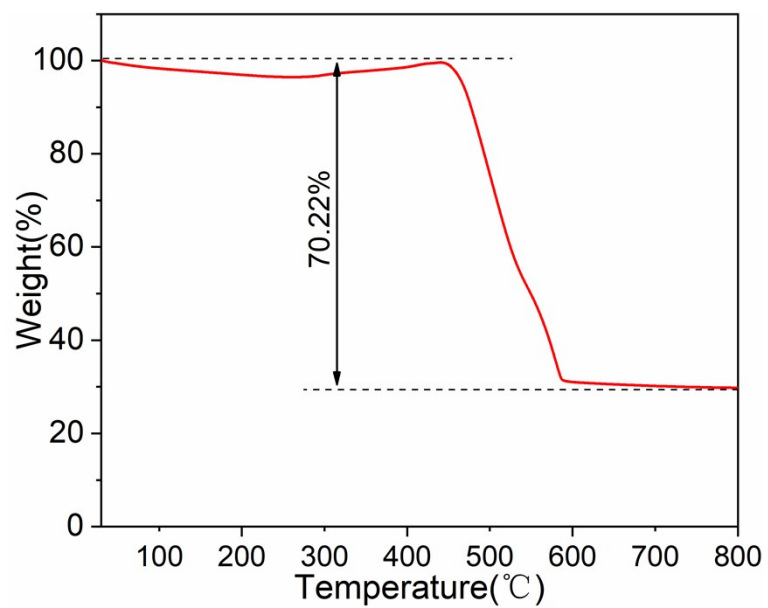

**Figure. S2** TGA analysis of NCSNC@C/CNT, through which the mass ratio of NCSNC in NCSNC@C/CNT is calculated to be 56.33% in total.

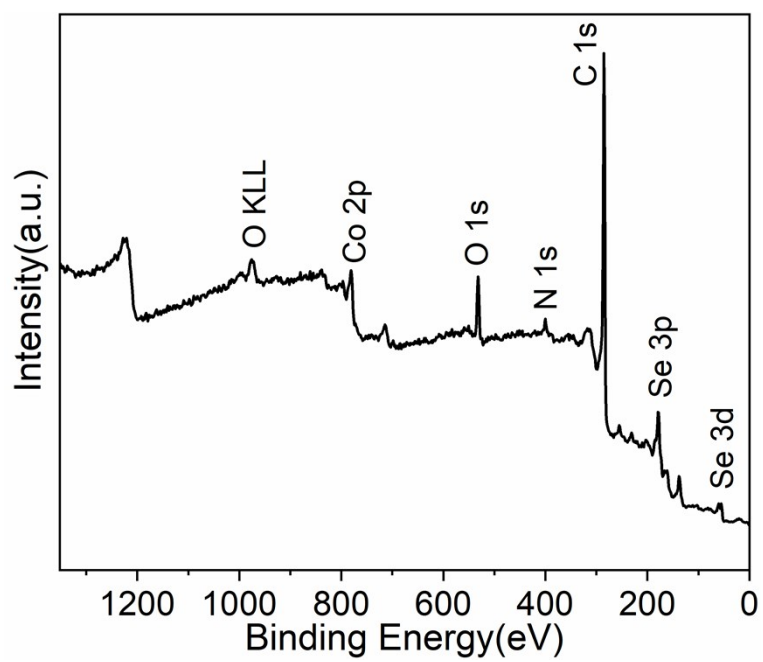

**Figure. S3** XPS spectra of NCSNC@C/CNT.

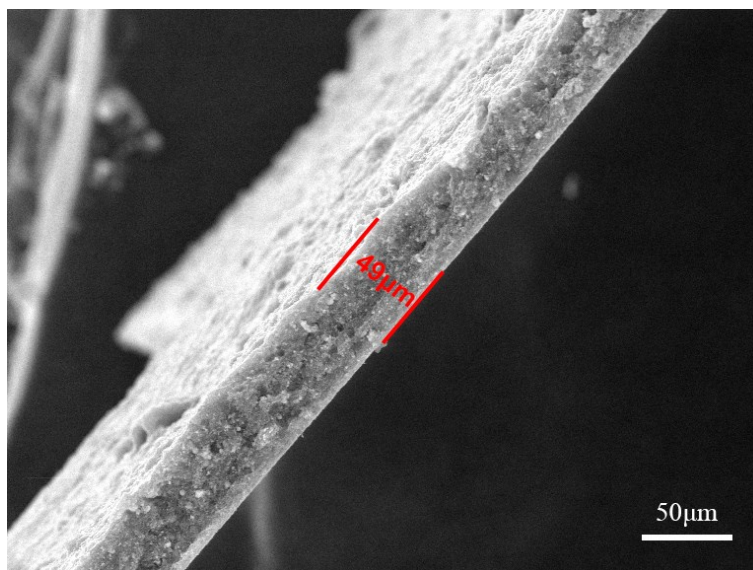

**Figure. S4** Cross section SEM image of the as prepared NCSNC@C/CNT film, the thickness of the film is about 49µm.

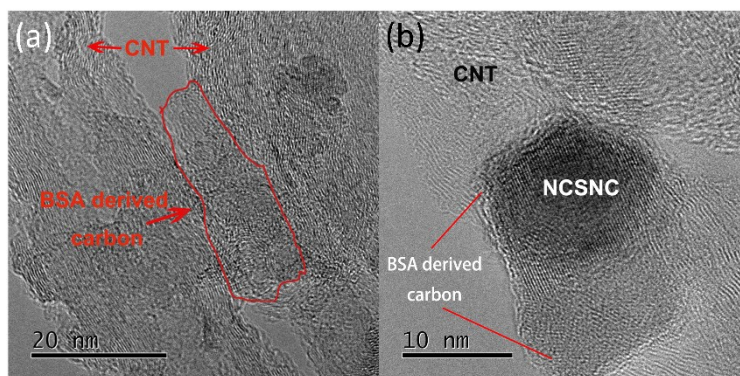

**Figure. S5** TEM image of NCSNC@C/CNT: (a) BSA derived carbon helps to connect CNTs and improves the plasticity of the as-prepared composite film; (b) BSA derived carbon helps to anchor NCSNC onto CNT and ensure an efficient electron transport.

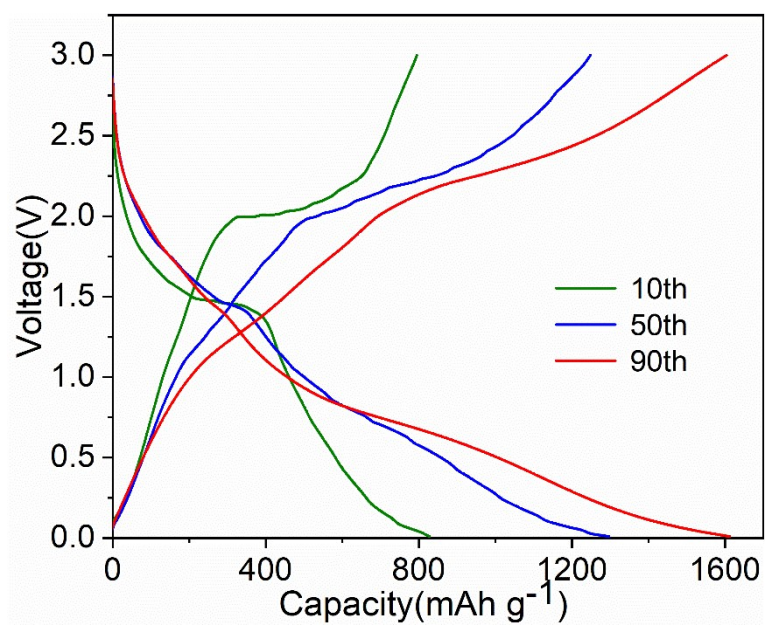

**Figure. S6** The 10<sup>th</sup>, 50<sup>th</sup> and 90<sup>th</sup> Charge-discharge curves of NCSNC@C/CNT composite film electrode.

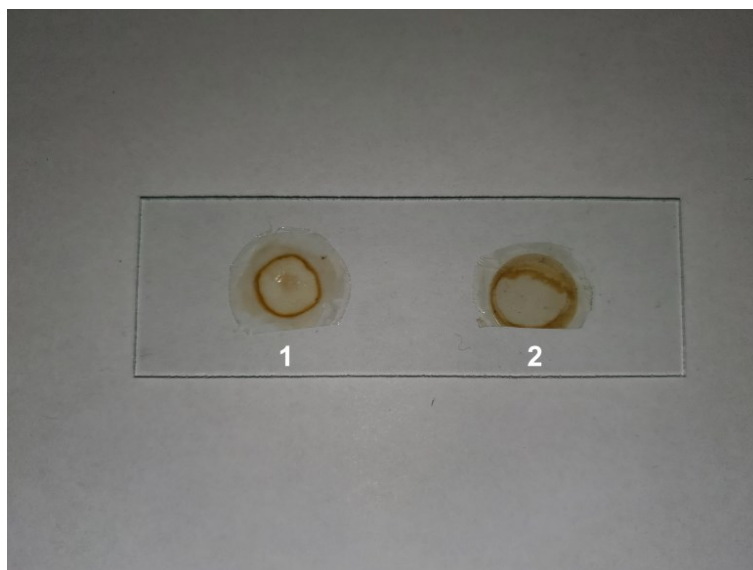

**Figure. S7** Separators of the after-cycling half coin cells for 250 cycles a the current density of 1A/g(1) NCSNC@C/CNT. (2) NCSNC.



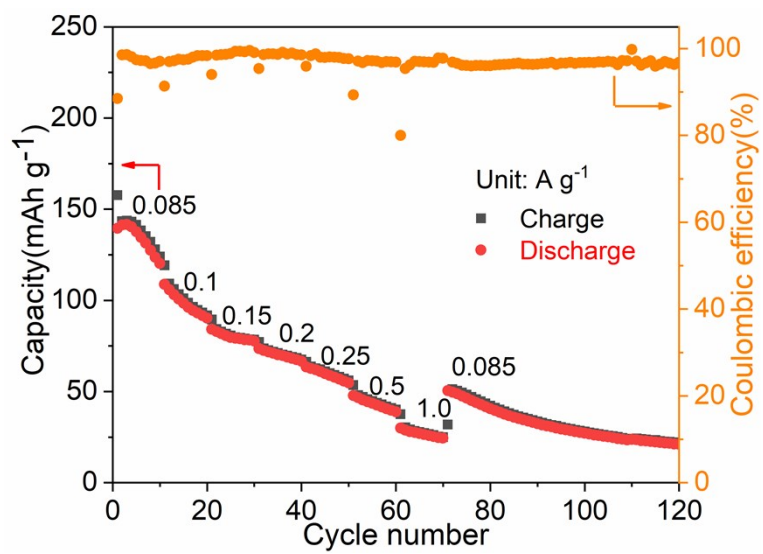

**Figure. S8** Rate capabilities of NCSNC@C/CNT//LiFePO<sub>4</sub> full cells.

| Cyclic capability list (lithium-ion battery)                                                       |                 |                                                                                              |                                                                                            |     |
|----------------------------------------------------------------------------------------------------|-----------------|----------------------------------------------------------------------------------------------|--------------------------------------------------------------------------------------------|-----|
| Co <sub>0.85</sub> Se based materials                                                              | Grain size (nm) | Cyclic performance (mAh g <sup>-1</sup> )                                                    |                                                                                            | Ref |
|                                                                                                    |                 | Low current density                                                                          | high current density                                                                       |     |
| Co <sub>0.85</sub> Se nanosheets                                                                   | /               | 516 mAh g <sup>-1</sup> at 0.2 A g <sup>-1</sup> after 50 cycles (50 cycles in total)        | /                                                                                          | 1   |
| Co <sub>0.85</sub> Se nanosheets@N-doped carbon nanosheets                                         | /               | 636 mAh g <sup>-1</sup> at 0.2 A g <sup>-1</sup> after 100 cycles (100 cycles in total)      | 399 mAh g <sup>-1</sup> at 5 A g <sup>-1</sup> after 500 cycles (500 cycles in total)      | 2   |
| Co <sub>0.85</sub> Se nanosheets/graphene                                                          | /               | 730 mAh g <sup>-1</sup> at 0.5 A g <sup>-1</sup> after 300cycles (300 cycles in total)       | 478.3 mAh g <sup>-1</sup> at 1 A g <sup>-1</sup> after 300 cycles (300 cycles in total)    | 3   |
| Co <sub>0.85</sub> Se@C/Ti <sub>3</sub> C <sub>2</sub> T <sub>x</sub> MXene                        | ~29.9           | 700 mAh g <sup>-1</sup> at 0.2 A g <sup>-1</sup> after 270 cycles (270 cycles in total)      | /                                                                                          | 4   |
| Co <sub>0.85</sub> Se@N-doped reduced graphene oxide                                               | ~200            | 1471 mAh g <sup>-1</sup> at 0.1 A g <sup>-1</sup> after 60 cycles (100 cycles in total)      | 787.7 mAh g <sup>-1</sup> at 2 A g <sup>-1</sup> after 1000 cycles (1000 cycles in total)  | 5   |
| Co <sub>0.85</sub> Se Nanoparticles Encapsulated by Nitrogen-Enriched Hierarchically Porous Carbon | ~20             | /                                                                                            | 638.4 mAh g <sup>-1</sup> at 1 A g <sup>-1</sup> after 200 cycles (200 cycles in total)    | 6   |
| <b>This work</b>                                                                                   | ~17             | <b>1582 mAh g<sup>-1</sup> at 0.2 A g<sup>-1</sup> after 80 cycles (100 cycles in total)</b> | <b>499 mAh g<sup>-1</sup> at 1 A g<sup>-1</sup> after 250 cycles (250 cycles in total)</b> | /   |

**Table. S1** Comparison of the cyclic capabilities of Co<sub>0.85</sub>Se based LIB anode materials.

| Rate capability list (lithium-ion battery)                                          |                 |                                        |                       |                       |                     |                     |                     |          |
|-------------------------------------------------------------------------------------|-----------------|----------------------------------------|-----------------------|-----------------------|---------------------|---------------------|---------------------|----------|
| Co <sub>0.85</sub> Se based materials                                               | Grain size (nm) | Rate capability (mAh g <sup>-1</sup> ) |                       |                       |                     |                     |                     | Ref      |
|                                                                                     |                 | 0.1 A g <sup>-1</sup>                  | 0.2 A g <sup>-1</sup> | 0.5 A g <sup>-1</sup> | 1 A g <sup>-1</sup> | 2 A g <sup>-1</sup> | 5 A g <sup>-1</sup> |          |
| Co <sub>0.85</sub> Se nanosheets                                                    | /               | 675                                    | 645                   | 574                   | 493                 | 374                 | /                   | 1        |
| Co <sub>0.85</sub> Se nanosheets@N-doped carbon nanosheets                          | /               | /                                      | 802                   | 694                   | 496                 | 378                 | 252                 | 2        |
| Co <sub>0.85</sub> Se nanosheets/graphene                                           | /               | 750                                    | 790                   | 664.5                 | 613.3               | 522.7               | 327.8               | 3        |
| Co <sub>0.85</sub> Se@C/Ti <sub>3</sub> C <sub>2</sub> T <sub>x</sub> MXene         | ~29.9           | 365.1                                  | /                     | 270.3                 | 193.2               | 100.8               | /                   | 4        |
| Co <sub>0.85</sub> Se@N-doped reduced graphene oxide                                | ~200            | 862.8                                  | 929                   | 973.7                 | 945.6               | 871.6               | 643.9               | 5        |
| Co <sub>0.85</sub> Se Nanoparticles @Nitrogen-Enriched Hierarchically Porous Carbon | ~20             | 696.1                                  | 657.3                 | 632.4                 | 585.9               | 511.8               | 401.7               | 6        |
| <b>This work</b>                                                                    | <b>~17</b>      | <b>797</b>                             | <b>824</b>            | <b>830</b>            | <b>776</b>          | <b>687</b>          | <b>548</b>          | <b>/</b> |

**Table. S2** Comparison of the Rate capabilities of Co<sub>0.85</sub>Se based LIB anode materials.

## References

1. J. Zhou, Y. Wang, J. Zhang, T. Chen, H. Song and H. Y. Yang, *Nanoscale*, 2016, **8**, 14992-15000.
2. G. Wang, H. Yue, Y. Xu, G. Liu, R. Jin and S. Gao, *J. Colloid. Interf. Sci*, 2020, **570**, 332-339.
3. G. Zhang, K. Liu, S. Liu, H. Song and J. Zhou, *J. Alloy. Compd*, 2018, **731**, 714-722.
4. W. Ding, S. Wang, X. Wu, Y. Wang, Y. Li, P. Zhou, T. Zhou, J. Zhou and S. Zhuo, *J. Alloy. Compd*, 2020, **816**, 152566.
5. C. Wang, B. Zhang, X. Ou, H. Xia, L. Cao, L. Ming and J. Zhang, *J. Colloid. Interf. Sci*, 2020, **573**, 223-231.
6. X. Zhang, J. Zhou, Y. Zheng and D. Chen, *ACS. Appl. Mater & Inter*, 2020, **12**, 9236-9247.
